# Supplementary material for: Raw milk kefir: microbiota, bioactive peptides, and immune modulation
Source: Royal Society of Chemistry journal article supplement (doi:10.1039/d2fo03248a), 2023-01-01
Supplement: d2fo03248a2.xlsx [file d2fo03248a2.xlsx]

## Sheet: ASV ITS2
Supplemental file 2. Microbial species in raw milk and heated milk. Dynamics of the microbial population after the first day of fermentation at 28 °C and during three weeks of storage at 4 °C. Values indicate the relative abundance expressed as the number of reads per ASV per sample divided by the total number of filtered reads per sample.
Type	RM	RMK	RMK	RMK	RMK	RMK	RMK	HMK	SC
Time	0	1h	6h	12h	1d	1w	3w	1d	freeze dried
Debaryomyces 1	0.421889	0.981155	0.989368	0.922688	0.848599	0.921194	0.933395	0.997288	0.998351
Pichia kudriavzevii cat	0.063325	0.000674	0.001234	0.003613	0.119058	0.051075	0.004771	0	0
Galactomyces cat	0.054724	0.002539	0.001204	0.005058	0.023561	0.014148	0.007688	0	0
Pichia fermentans cat	0.00822397	0.000436	0.000147	0	0.002649	0.002547	0.052073	0.000103	0
Debaryomyces 2	0	0.003233	0.00235	0	0	0	0.001936	0.00204	0.001511
Erythrobasidium hasegawianum	0.0199774	0.000694	0.000822	0.010116	0	0	0	0.000181	5.15e-05
Malassezia restricta cat	0.0911147	0.000456	0.001175	0.003613	0	0.001839	0	0.000207	0
Wickerhamiella pararugosa	0	9.91867e-05	0	0	0.00320647	0.000565931	0	0	0
Malassezia globosa cat	0.0895042	0.000913	0.001292	0	0	0.001132	0	0	0
Candida tropicalis	0	0	0	0	0.00237	0.000566	0	0	0
Malassezia sympodialis	0	0	0	0	0	0.001556	0.000136	0	0
Saccharomyces cerevisiae cat	0	0	0	0.054913	0	0	0	0	8.59e-05
Candida akabanensis	0	0	0	0	0.000558	0	0	0	0
Candida zeylanoides 1	0	0	8.81e-05	0	0	0	0	0	0
Acremonium alternatum/sclerotigenum	0	0	0	0	0	0.000849	0	0	0
Alternaria rudbeckiae/ Alternaria alternata	0	0	0.000206	0	0	0	0	0	0
Aspergillus 1	0	0	0	0	0	0	0	5.17e-05	0
Beauveria	0	0	0.000206	0	0	0	0	0	0
Candida albicans 1	0.007093	0	0.000206	0	0	0	0	0	0
Cladosporium 1	0	0	0.000147	0	0	0	0	0	0
Cladosporium sloanii,psychrotolerans ,neolangeronii	0	0	0.000323	0	0	0	0	0	0
Cutaneotrichosporon moniliiforme	0	0	0	0	0	0.001839	0	0	0
Diutina catenulata	0.020423	0	0	0	0	0.000566	0	0	0
Malassezia slooffiae	0	0	0.00047	0	0	0	0	0	0
Naganishia friedmannii, onofrii / Cryptococcus sp.	0	0	0	0	0	0.002122	0	0	0
Neodevriesia fraserae	0	0	0	0	0	0	0	0.000129	0
Trichosporon ovoides1	0.000137	0	0.000294	0	0	0	0	0	0
unknown uncultured	0.007025	0	0.00047	0	0	0	0	0	0
Other	0.09132	0.0098	0	0	0	0	0	0	0
Talaromyces diversus	0.039818	0	0	0	0	0	0	0	0
Paecilomyces sp. (in: Eurotiomycetes)	0.050406	0	0	0	0	0	0	0	0
Cladosporium ramotenellum	0.03502	0	0	0	0	0	0	0	0

## Sheet: 16S-RA
Supplemental file 2. Microbial species in raw milk and heated milk. Dynamics of the microbial population after the first day of fermentation at 28 °C and during three weeks of storage at 4 °C. Values indicate the relative abundance expressed as the number of reads per ASV per sample divided by the total number of filtered reads per sample.
Type	RM	RMK	RMK	RMK	RMK	RMK	RMK	HMK	SC
Time	0	1h	6h	12h	1d	1w	3w	1d	freeze dried
Corynebacterium variabile	0.002779	0	6.62e-05	0	0	0	0	0	0
Dadabacteriales	0	0	0	0	0	0	0	6.17e-05	0
Lactococcus 3	0	0	0	0	0	0.002172	0	0	0
other	0.206511	0.005475	0	0	0	0	0	0	0
Lactococcus 4	0	0.000895	0.00096	0	0	0	0	0.000802	0.000643
Lactococcus 1	0	0.0034	0.002948	0	0	0	0	0	0
Burkholderia-Caballeronia-Paraburkholderia	0.685781	0.014135	0.000861	0	0	0	0	0	0
Streptococcus dysgalactiae	0.013329	0.000179	0.000563	0	7.89e-05	5.79e-05	6.34e-05	0	0
Lactococcus 2	0	0.001682	0	0.000637	0.000605	0.000724	0.000825	0.001604	0.0015
Leuconostoc 2	0	0.028557	0.002517	0.001517	0.003443	0.003996	0.003584	0.044145	0.029543
Lactococcus lactis 2	0	0.065094	0.008876	0	0.003706	0.003272	0.004915	0.090387	0.069495
Leuconostoc 1	0	0.038434	0.002815	0.002305	0.004495	0.003098	0.00593	0.045471	0.137919
Lactococcus lactis 3	0	0.020362	0.026826	0.005126	0.006072	0.005473	0.004059	0	0
Lactococcus 7	0	0	0	0.006703	0.007596	0.008484	0.009387	0	0
Streptococcus thermophilus 1	0.002467	0.028879	0.006491	0.051228	0.03609	0.038771	0.03685	0.025327	0.050208
Streptococcus thermophilus 4	0	0.031599	0.008644	0.057749	0.040374	0.043114	0.042019	0.030633	0.064107
Streptococcus thermophilus 2	0	0.030239	0.00722	0.066394	0.045605	0.048877	0.045952	0.035075	0.067383
Streptococcus thermophilus 3	0	0.088427	0.020103	0.169032	0.120308	0.127664	0.118511	0.083971	0.184301
Lactococcus lactis 1	0.017895	0.642428	0.911111	0.639308	0.731627	0.714298	0.727904	0.642522	0.3949
Paeniclostridium	0.023907	0	0	0	0	0	0	0	0
Staphylococcus 4	0.012138	0	0	0	0	0	0	0	0
Weissella jogaejeotgali	0.010011	0	0	0	0	0	0	0	0
Peptostreptococcaceae	0.008706	0	0	0	0	0	0	0	0
Romboutsia	0.008394	0	0	0	0	0	0	0	0
Turicibacter	0.008082	0	0	0	0	0	0	0	0
