# Supplementary material for: Raw milk kefir: microbiota, bioactive peptides, and immune modulation
Source: Royal Society of Chemistry journal article supplement (doi:10.1039/d2fo03248a), 2023-01-01
Supplement: d2fo03248a3.pdf [file d2fo03248a3.pdf]

*Supplemental file 3. Precursor proteins of kefir peptides with the total peptide intensity (log10) in raw milk (RM), heated milk (HM), raw milk kefir (RMK), and heated milk kefir (HMK). Shown are proteins with at least 5 identified peptides in one of the 4 samples, arranged on the intensity in RM. Color gradient represents high intensity (green) to low intensity (red).*

| Protein name                                     | RM   | HM   | RMK  | HMK  |
|--------------------------------------------------|------|------|------|------|
| $\alpha_{S1}$ -casein                            | 10.4 | 10.5 | 11.6 | 11.6 |
| Glycosylation-dependent cell adhesion molecule 1 | 10.1 | 10.0 | 11.4 | 11.2 |
| $\alpha_{S2}$ -casein                            | 10.1 | 10.0 | 11.1 | 11.2 |
| $\beta$ -casein                                  | 10.0 | 9.9  | 12.0 | 12.1 |
| Polymeric immunoglobulin receptor                | 9.4  | 9.4  | 10.4 | 10.4 |
| Perilipin-2                                      | 8.8  | 8.8  | 8.7  | 8.2  |
| Butyrophilin subfamily 1 member A1               | 8.8  | 8.8  | 8.9  | 8.9  |
| Glycoprotein 2                                   | 8.7  | 8.7  | 6.7  | 8.4  |
| Sodium-dependent phosphate transport protein 2B  | 8.6  | 8.6  | 9.0  | 9.0  |
| Lactoperoxidase                                  | 8.6  | 8.6  | 7.5  | 8.2  |
| Kappa-casein                                     | 8.4  | 9.3  | 11.6 | 11.9 |
| Osteopontin                                      | 8.0  | 8.0  | 9.9  | 9.9  |
| $\beta$ -lactoglobulin                           | 8.0  | 9.7  | 7.8  | 8.5  |
| $\beta$ -2-microglobulin                         | NA   | NA   | 9.5  | 9.2  |
| Nucleobindin-1                                   | NA   | NA   | 8.6  | 8.2  |
