# Supplementary material for: Raw milk kefir: microbiota, bioactive peptides, and immune modulation
Source: Royal Society of Chemistry journal article supplement (doi:10.1039/d2fo03248a), 2023-01-01
Supplement: d2fo03248a4.pdf [file d2fo03248a4.pdf]

Supplemental file 4

Overview of bioactivities found with the Milk Bioactive Peptide Database (MBPDB) that match with identified peptide sequences (Nielsen et al., 2017). Colour gradient represents high numbers (green) to low numbers (red) of peptides matching with bioactivities.

| Bioactivity                          | Number of times bioactivities were found for peptide sequences identified: |                      |                 |                 |
|--------------------------------------|----------------------------------------------------------------------------|----------------------|-----------------|-----------------|
|                                      | More abundant in HMK                                                       | More abundant in RMK | Uniquely in HMK | Uniquely in RMK |
| ACE-inhibitory                       | 328                                                                        | 255                  | 40              | 63              |
| Antioxidant                          | 173                                                                        | 119                  | 20              | 39              |
| Antimicrobial                        | 143                                                                        | 121                  | 18              | 34              |
| DPP-IV inhibitory                    | 92                                                                         | 85                   | 7               | 23              |
| Anti-inflammatory                    | 51                                                                         | 15                   | 15              | 6               |
| Opioid                               | 48                                                                         | 27                   | 2               | 9               |
| Immunomodulatory                     | 37                                                                         | 32                   | 5               | 12              |
| Anticancer                           | 26                                                                         | 22                   | 1               | 7               |
| Inhibition of cholesterol solubility | 20                                                                         | 14                   | 2               | 4               |
| Prolyl endopeptidase-inhibitory      | 20                                                                         | 19                   | 0               | 6               |
| Osteoanabolic                        | 18                                                                         | 13                   | 5               | 2               |
| Bradykinin-potentiating              | 17                                                                         | 3                    | 0               | 0               |
| Increase MUC4 expression             | 12                                                                         | 4                    | 1               | 1               |
| Growth-promoting                     | 11                                                                         | 4                    | 2               | 2               |
| Anxiolytic                           | 10                                                                         | 10                   | 0               | 4               |
| Cytomodulatory                       | 10                                                                         | 11                   | 2               | 3               |
| Antithrombotic                       | 8                                                                          | 4                    | 2               | 3               |
| Ameliorates insulin resistance       | 6                                                                          | 1                    | 2               | 0               |
| Antihypertensive                     | 6                                                                          | 3                    | 0               | 1               |
| Increases jejunal mucus secretion    | 6                                                                          | 8                    | 0               | 3               |
| Increases MUC2 expression            | 6                                                                          | 8                    | 0               | 3               |
| Increases MUC3 expression            | 6                                                                          | 8                    | 0               | 3               |
| Increases MUC5a expression           | 6                                                                          | 8                    | 0               | 3               |
| Reduces pancreas MDA level           | 6                                                                          | 8                    | 0               | 3               |
| Satiety                              | 6                                                                          | 8                    | 0               | 3               |
| Cathepsin B inhibitory               | 5                                                                          | 7                    | 0               | 3               |
| Antithrombin                         | 4                                                                          | 0                    | 1               | 0               |
| Anti-apoptotic effect                | 3                                                                          | 2                    | 1               | 0               |
| Wound healing                        | 3                                                                          | 2                    | 1               | 0               |
| Cytotoxic                            | 2                                                                          | 0                    | 0               | 0               |
| Non-functional                       | 2                                                                          | 6                    | 0               | 2               |
| Cancer                               | 1                                                                          | 3                    | 0               | 1               |
| Improves learning and memory         | 1                                                                          | 3                    | 0               | 1               |

|                                                                                                                            |   |   |   |   |
|----------------------------------------------------------------------------------------------------------------------------|---|---|---|---|
| Increases intestinal motility                                                                                              | 1 | 3 | 0 | 1 |
| Promote neurite outgrowth                                                                                                  | 1 | 3 | 0 | 1 |
| Stimulates proliferation                                                                                                   | 1 | 0 | 0 | 0 |
| Increase small intestinal goblet cell density                                                                              | 0 | 1 | 0 | 0 |
| Promote calcium uptake                                                                                                     | 0 | 2 | 0 | 1 |
| Protective effects in indomethacin-induced enteritis through preservation of goblet cells and improvement in wound healing | 0 | 1 | 0 | 0 |
