# Supplementary material for: Raw milk kefir: microbiota, bioactive peptides, and immune modulation
Source: Royal Society of Chemistry journal article supplement (doi:10.1039/d2fo03248a), 2023-01-01

Figure S1. Relative intensities of amino acids in P1 and P1' position for all peptides identified in (A) heated milk kefir (HMK) and (B) raw milk kefir (RMK). Relative intensities of amino acids in P1 and P1' position for uniquely identified peptides in (C) HMK and (D) RMK.

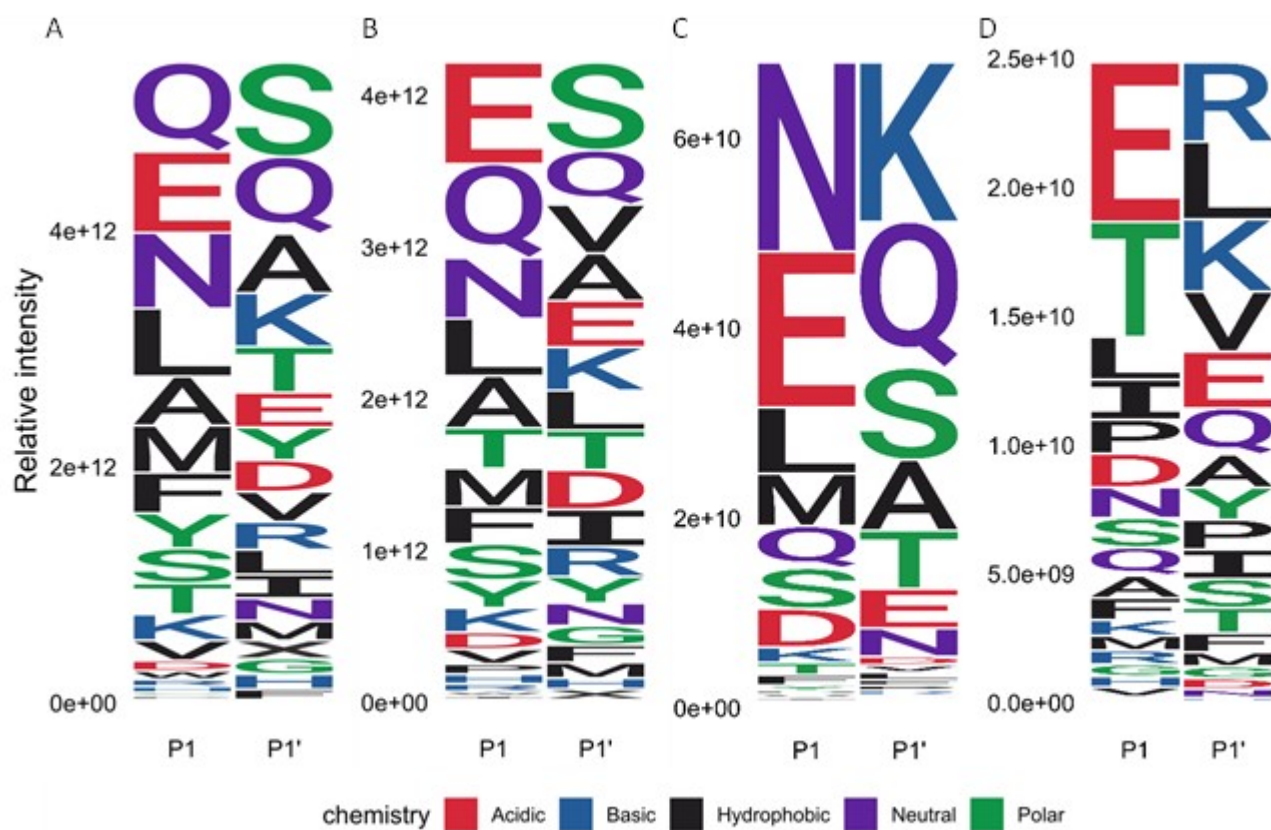

Supplement: d2fo03248a5.pdf [file d2fo03248a5.pdf]
